# Supplementary material for: Novel thiol-functionalized covalent organic framework-enabled ICP-MS measurement of ultra-trace metals in complex matrices
Source: Royal Society of Chemistry journal article supplement (doi:10.1039/d1ja00341k), 2021-12-01
Supplement: d1ja00341k1.pdf [file d1ja00341k1.pdf]

## Supporting Information

### **Novel thiol-functionalized covalent organic frameworks enabled ICP-MS measurement of ultra-trace metals in complex metrics**

Yong Tian<sup>a</sup>, Jiawen Cheng<sup>a</sup>, Xiaoxuan Han<sup>b\*</sup>, Yutong Li<sup>b</sup>, Ting Yang<sup>b\*</sup>, Ming-Li Chen<sup>b</sup>,  
Jiping Ma<sup>a</sup>, Jian-Hua Wang<sup>b</sup>

<sup>a</sup> School of Environmental & Municipal Engineering, Qingdao University of Technology, Qingdao 266033, China

<sup>b</sup> Research Center for Analytical Sciences, and Department of Chemistry, College of Sciences, Northeastern University, Shenyang 110819, China

\* Corresponding authors:

Ting Yang, E-mail address: yangting@mail.neu.edu.cn

Xiaoxuan Han, E-mail address: hanxiaoxuan97@163.com

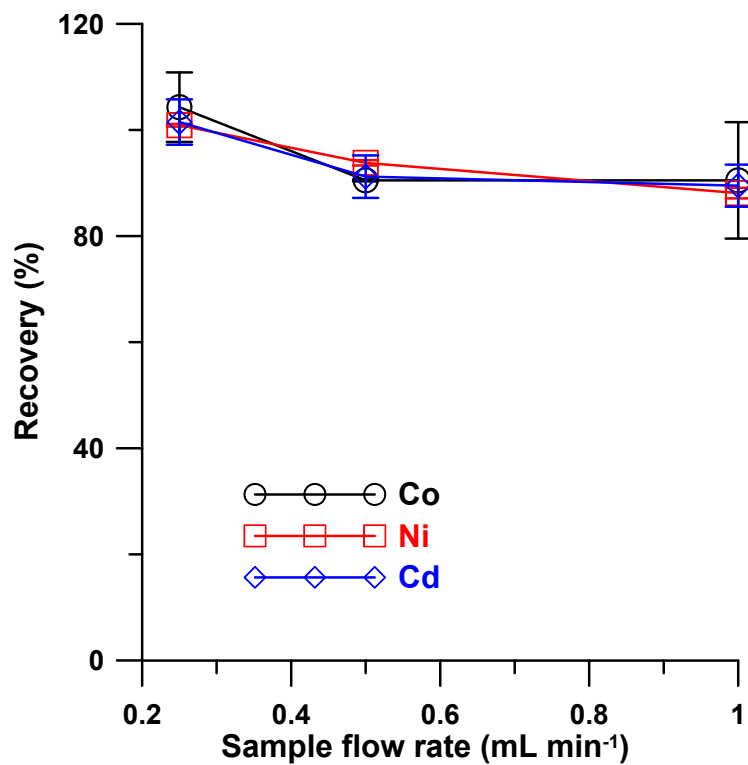

Figure S1. The effects of the sample flow rate on the recoveries of Co<sup>2+</sup>, Ni<sup>2+</sup> and Cd<sup>2+</sup> pre-concentrated on the TpDvPa-S-SH micro-column. Sample volume: 5 mL; sample pH: 6; eluent: 0.5 mol L<sup>-1</sup> HNO<sub>3</sub>, 0.2 mL; Co<sup>2+</sup> and Cd<sup>2+</sup>: 0.01 μg L<sup>-1</sup>; Ni<sup>2+</sup>: 0.05 μg L<sup>-1</sup>.

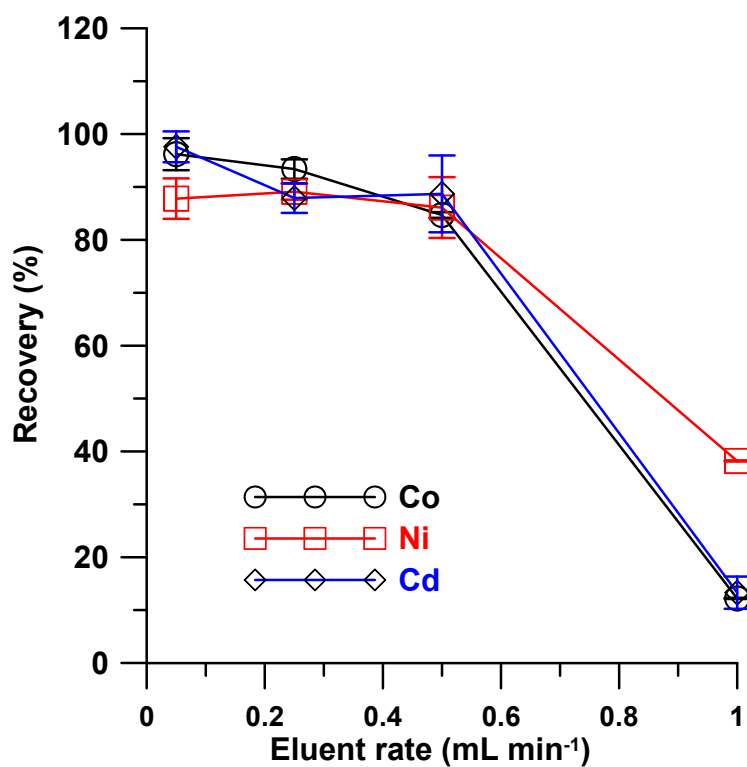

Figure S2. The effects of the eluent rate on the recoveries of Co<sup>2+</sup>, Ni<sup>2+</sup> and Cd<sup>2+</sup> preconcentrated on the TpDvPa-S-SH micro-column. Sample volume: 5 mL; sample pH: 6; eluent: 0.5 mol L<sup>-1</sup> HNO<sub>3</sub>, 0.2 mL; Co<sup>2+</sup> and Cd<sup>2+</sup>: 0.01 μg L<sup>-1</sup>; Ni<sup>2+</sup>: 0.05 μg L<sup>-1</sup>.

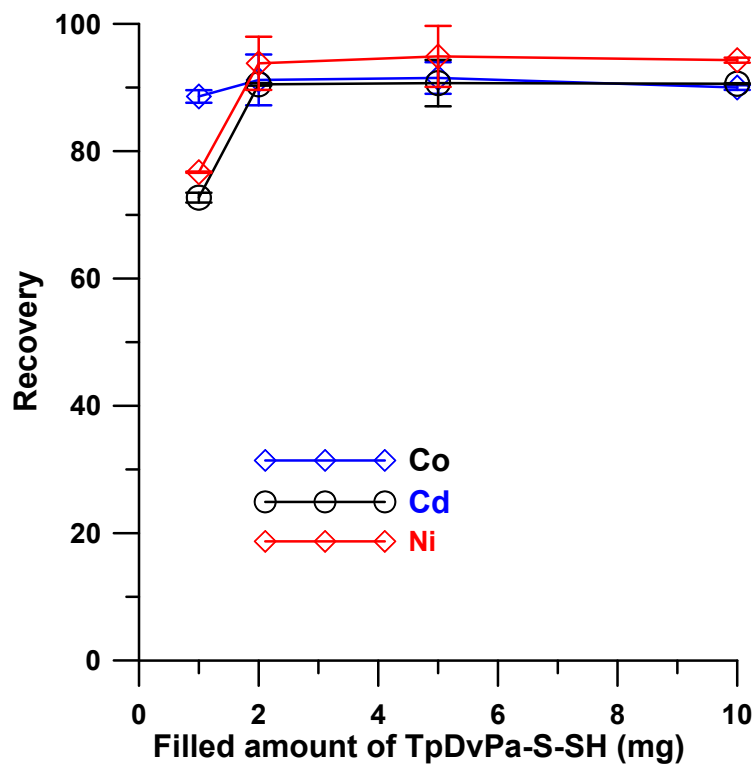

Figure S3. The effects of the filled amount of TpDvPa-S-SH on the recoveries of  $\text{Co}^{2+}$ ,  $\text{Ni}^{2+}$  and  $\text{Cd}^{2+}$  pre-concentrated on the TpDvPa-S-SH micro-column. Sample volume: 5 mL; sample pH: 6; eluent:  $0.5 \text{ mol L}^{-1} \text{ HNO}_3$ , 0.2 mL;  $\text{Co}^{2+}$  and  $\text{Cd}^{2+}$ :  $0.01 \mu\text{g L}^{-1}$ ;  $\text{Ni}^{2+}$ :  $0.05 \mu\text{g L}^{-1}$ .

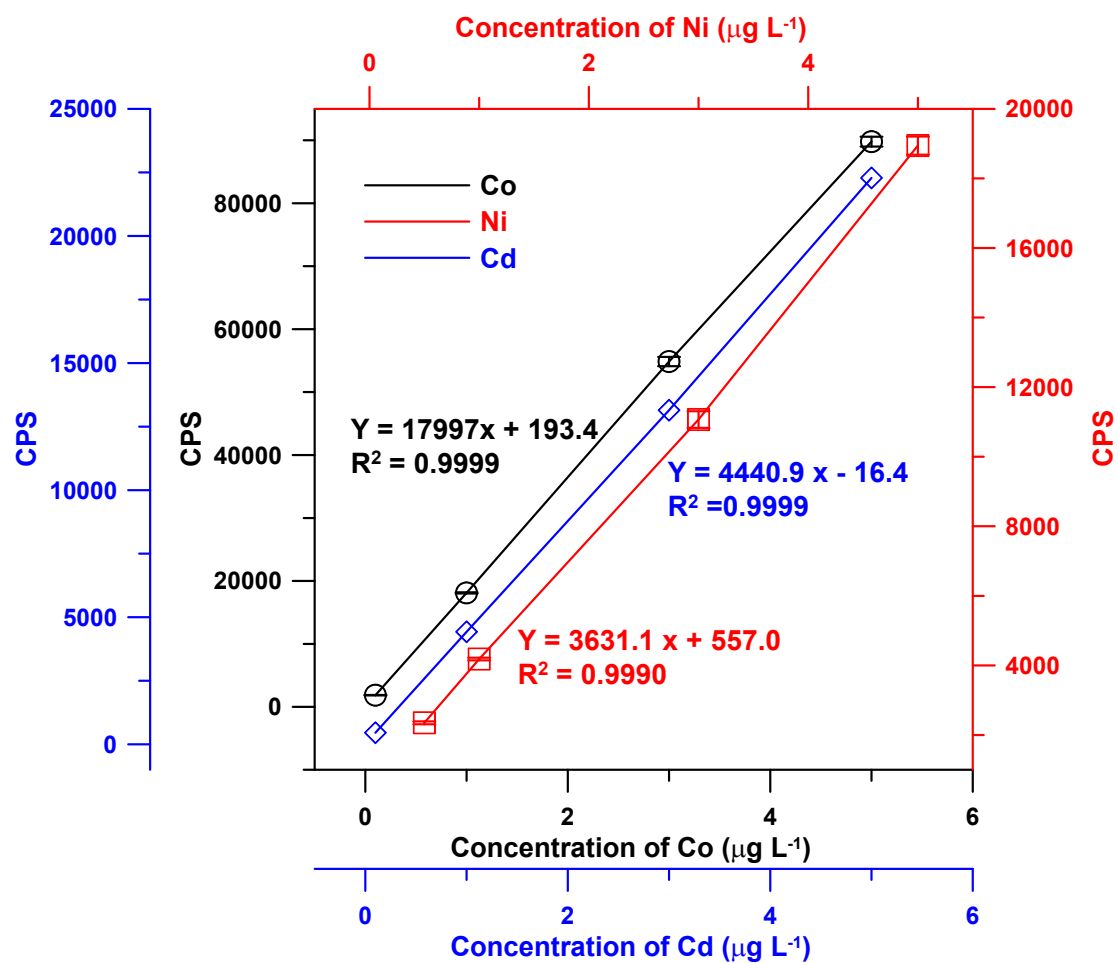

Figure S4. The detected signals of  $\text{Co}^{2+}$ ,  $\text{Ni}^{2+}$  and  $\text{Cd}^{2+}$  measured by ICP-MS directly.

Table S1. The operation parameters of ICP-MS.

| ICP-MS                    |                                                       |
|---------------------------|-------------------------------------------------------|
| Nebulizer                 | MicroMIST                                             |
| RF power                  | 1500 W                                                |
| Sampling depth            | 10 mm                                                 |
| Sample uptake speed       | 1.5 ml min <sup>-1</sup>                              |
| Sample stabilization time | 20 s                                                  |
| Spray chamber temperature | 2 °C                                                  |
| Plasma gas flow rate      | 15 L min <sup>-1</sup>                                |
| Auxiliary gas flow rate   | 1 L min <sup>-1</sup>                                 |
| Nebulizer gas flow rate   | 1 L min <sup>-1</sup>                                 |
| Dilution gas flow rate    | 1 L min                                               |
| Carrier gas flow rate     | 0.8 L min <sup>-1</sup>                               |
| Analytical masses         | <sup>59</sup> Co, <sup>60</sup> Ni, <sup>111</sup> Cd |
